# Supplementary material
Source: PubMed Central journal article supplement (PMC3191110)
Supplement: NIHMS319806-supplement-1_si_001.pdf [file NIHMS319806-supplement-1_si_001.pdf]

## Supporting Information

### **Polybrominated diphenyl ethers (PBDEs), hydroxylated PBDEs, and thyroid hormones in second trimester pregnant women in California**

Ami R. Zota<sup>1\*</sup>, June-Soo Park<sup>2</sup>, Yunzhu Wang<sup>2</sup>, Myrto Petreas<sup>2</sup>, R.Thomas Zoeller<sup>3</sup>, Tracey J. Woodruff<sup>1</sup>

---

*Environmental Science and Technology*

Total number of pages (including cover page): 9

Page S2: Table S1

Page S3: Table S2

Page S4: Table S3

Pages S5-S6: Table S4

Page S7: Table S5

Pages S8-S9: Literature Cited

<sup>1</sup>Program on Reproductive Health and the Environment, University of California, San Francisco, Oakland, California, USA

<sup>2</sup>Department of Toxic Substances Control, California Environmental Protection Agency, Berkeley, California, USA

<sup>3</sup>Biology Department, Morrill Science Center, University of Massachusetts at Amherst, Amherst, Massachusetts, USA

\*Corresponding author: [zotaar@obgyn.ucsf.edu](mailto:zotaar@obgyn.ucsf.edu), phone: 510.986.8928; fax: 510.986.8960

Table S1. List of PBDE congeners and OH-PBDEs measured in the serum of second trimester pregnant women from Northern and Central California by PBDE commercial mixture.<sup>1</sup>

|                 | penta-BDE | octa-BDE | deca-BDE |
|-----------------|-----------|----------|----------|
| <b>PBDEs</b>    |           |          |          |
| BDE-017         | x         |          |          |
| BDE-028         | x         |          |          |
| BDE-047         | x         |          |          |
| BDE-066         | x         |          |          |
| BDE-085         | x         |          |          |
| BDE-099         | x         |          |          |
| BDE-100         | x         |          |          |
| BDE-153         | x         | x        |          |
| BDE-154         | x         | x        |          |
| BDE-183         |           | x        |          |
| BDE-196         |           | x        |          |
| BDE-197         |           |          |          |
| BDE-201         |           | x        |          |
| BDE-202         |           |          |          |
| BDE-203         |           | x        |          |
| BDE-206         |           | x        | x        |
| BDE-207         |           | x        | x        |
| BDE-208         |           | x        | x        |
| BDE-209         |           | x        | x        |
| <b>OH-PBDEs</b> |           |          |          |
| 6'-OH-BDE17     |           |          |          |
| 4'-OH-BDE17     |           |          |          |
| 2'-OH-BDE28     |           |          |          |
| 6'-OH-BDE49     |           |          |          |
| 2'-OH-BDE68     |           |          |          |
| 6-OH-BDE47      |           |          |          |
| 3-OH-BDE47      |           |          |          |
| 5-OH-BDE47      |           |          |          |
| 4'-OH-BDE49     |           |          |          |
| 6-OH-BDE99      |           |          |          |
| 5'-OH-BDE100    |           |          |          |
| 6-OH-BDE90      |           |          |          |
| 5'-OH-BDE99     |           |          |          |
| 4'-OH-BDE101    |           |          |          |
| 2-OH-BDE123     |           |          |          |
| 6-OH-BDE85      |           |          |          |
| 4'-OH-BDE103    |           |          |          |
| 6-OH-BDE137     |           |          |          |

<sup>1</sup> Congener composition of PBDE commercial mixtures adapted from La Guardia et al.[1]

Table S2. Average percent recoveries ( $\pm$  standard deviation) of labeled internal standards of PBDEs and OH-PBDEs and of QC materials analyzed together with serum.

| Percent recoveries $\pm$ standard deviation (%) |                                                   |                                           |                         |
|-------------------------------------------------|---------------------------------------------------|-------------------------------------------|-------------------------|
|                                                 | Labeled surrogate<br>internal standards<br>(n=45) | In-house matrix<br>spike control<br>(n=4) | NIST SRM 1589a<br>(n=4) |
| BDE-28L*                                        | 94 $\pm$ 12                                       | 100 $\pm$ 5                               | 93 $\pm$ 7              |
| BDE-17                                          |                                                   | 88 $\pm$ 5                                |                         |
| BDE-28                                          |                                                   | 94 $\pm$ 5                                |                         |
| BDE-47L*                                        | 104 $\pm$ 9                                       | 109 $\pm$ 6                               | 108 $\pm$ 9             |
| BDE-47                                          |                                                   | 89 $\pm$ 3                                | 104 $\pm$ 4             |
| BDE-99L*                                        | 110 $\pm$ 9                                       | 112 $\pm$ 9                               | 111 $\pm$ 8             |
| BDE-66                                          |                                                   | 98 $\pm$ 7                                |                         |
| BDE-85                                          |                                                   | 86 $\pm$ 12                               |                         |
| BDE-99                                          |                                                   | 89 $\pm$ 5                                | 136 $\pm$ 12            |
| BDE-100                                         |                                                   | 84 $\pm$ 9                                | 108 $\pm$ 18            |
| BDE-153L*                                       | 126 $\pm$ 14                                      | 128 $\pm$ 9                               | 127 $\pm$ 15            |
| BDE-153                                         |                                                   | 80 $\pm$ 6                                |                         |
| BDE-154L*                                       | 122 $\pm$ 10                                      | 123 $\pm$ 7                               | 121 $\pm$ 9             |
| BDE-154                                         |                                                   | 85 $\pm$ 2                                |                         |
| BDE-183L*                                       | 120 $\pm$ 15                                      | 121 $\pm$ 13                              | 120 $\pm$ 15            |
| BDE-183                                         |                                                   | 94 $\pm$ 5                                |                         |
| BDE-196                                         |                                                   | 95 $\pm$ 1                                |                         |
| BDE-197L*                                       | 105 $\pm$ 13                                      | 123 $\pm$ 9                               | 108 $\pm$ 6             |
| BDE-197                                         |                                                   | 96 $\pm$ 5                                |                         |
| BDE-201                                         |                                                   | 96 $\pm$ 1                                |                         |
| BDE-202                                         |                                                   | 93 $\pm$ 1                                |                         |
| BDE-203                                         |                                                   | 95 $\pm$ 1                                |                         |
| BDE-207L*                                       | 83 $\pm$ 16                                       | 108 $\pm$ 9                               | 89 $\pm$ 9              |
| BDE-206                                         |                                                   | 96 $\pm$ 5                                |                         |
| BDE-207                                         |                                                   | 96 $\pm$ 4                                |                         |
| BDE-208                                         |                                                   | 98 $\pm$ 2                                |                         |
| BDE-209L*                                       | 55 $\pm$ 13                                       | 78 $\pm$ 8                                | 59 $\pm$ 9              |
| BDE-209                                         |                                                   | 95 $\pm$ 2                                |                         |
| 6-OH-BDE47L*                                    | 103 $\pm$ 15                                      |                                           |                         |

\*  $^{13}\text{C}_{12}$  labeled internal standards

Table S3. Descriptive statistics for PBDE chemicals expressed as ng/ml in the serum of second trimester pregnant women from Northern and Central California, 2008-2009 (N=25).

|                      | GM(GSD)      | 50 <sup>th</sup> | 95 <sup>th</sup> |
|----------------------|--------------|------------------|------------------|
| <u>PBDEs (ng/ml)</u> |              |                  |                  |
| BDE-028              | 0.016 (1.76) | 0.015            | 0.049            |
| BDE-047              | 0.294 (1.74) | 0.281            | 0.866            |
| BDE-066              | --           | < MDL            | 0.005            |
| BDE-085              | 0.006 (1.93) | 0.005            | 0.019            |
| BDE-099              | 0.079 (1.84) | 0.066            | 0.194            |
| BDE-100              | 0.061 (1.88) | 0.061            | 0.175            |
| BDE-153              | 0.105 (1.85) | 0.106            | 0.349            |
| BDE-154              | --           | < MDL            | 0.015            |
| BDE-183              | --           | < MDL            | 0.008            |
| BDE-196              | --           | < MDL            | < MDL            |
| BDE-197              | --           | < MDL            | 0.022            |
| BDE-201              | --           | < MDL            | < MDL            |
| BDE-203              | --           | < MDL            | < MDL            |
| BDE-206              | --           | < MDL            | < MDL            |
| BDE-207              | 0.011 (1.6)  | 0.010            | 0.022            |
| BDE-208              | --           | < MDL            | 0.021            |
| BDE-209              | --           | < MDL            | 0.637            |
| ΣPBDE <sub>5</sub>   | 0.584 (1.63) | 0.547            | 1.355            |

GM = geometric mean; GSD = geometric standard deviation. GM and GSD were only calculated for congeners with detection frequencies ≥ 50%.

Table S4. Median serum concentrations (ng/g lipid weight) of PBDEs and OH-PBDEs in pregnant women from different study locations

| Location                                     | Study period | N   | ∑PBDE | BDE-28 | BDE-47 | BDE-99 | BDE-100 | BDE-153 | BDE-209 | 5-OH-BDE47 | 6-OH-BDE47 | Ref           |
|----------------------------------------------|--------------|-----|-------|--------|--------|--------|---------|---------|---------|------------|------------|---------------|
| <b>United States</b>                         |              |     |       |        |        |        |         |         |         |            |            |               |
| Northern and Central California <sup>1</sup> | 2008-2009    | 25  | 85.8  | 2.3    | 43.1   | 11.5   | 9.0     | 15.5    | <MDL    | 5.2        | 3.5        | current study |
| NHANES (US) <sup>1</sup>                     | 2003-2004    | 75  | 55.9  | 1.3    | 23.7   | 5.1    | 6.6     | 7.8     |         |            |            | [2]           |
| Indiana <sup>2,3</sup>                       | 2003-2004    | 4   | 34    | 0.3    | 15     | 6.3    | 3.0     | 5.5     |         | 1.4        | 0.2        | [3]           |
| Southern California <sup>4</sup>             | 2003         | 28  |       | 1.3    | 18.8   | 6.5    | 5.1     | 6.9     |         |            |            | [4]           |
| New York City, New York                      | 2002         | 100 |       | 0.65   | 9.7    | 1.5    | 1.8     | 1.8     |         |            |            | [5]           |
| Indiana <sup>5</sup>                         | 2001         | 12  | 37    |        | 28     | 5.7    | 4.2     | 2.9     |         |            |            | [6]           |
| Salinas Valley, California <sup>1</sup>      | 1999-2000    | 270 | 25.2  | 0.5    | 15.0   | 4.0    | 2.4     | 2.1     |         |            |            | [7]           |
| <b>Europe</b>                                |              |     |       |        |        |        |         |         |         |            |            |               |
| Copenhagen <sup>2</sup>                      | 2007         | 51  | 1.8   | 0.03   | 0.38   | <MDL   | <MDL    | 1.1     | 1.7     |            |            | [8]           |
| France                                       | 2004-2006    | 91  |       | 0.12   | 2.8    | 1.9    | 0.37    | 0.72    | 5.8     |            |            | [9]           |
| Valencia, Spain <sup>6</sup>                 | 2003-2005    | 174 | 9.6   | <MDL   | 2.3    | 0.35   | <MDL    | 2.1     | <MDL    |            |            | [10]          |
| Madrid, Spain <sup>7</sup>                   | 2003-2004    | 61  | 9.1   | 0.06   | 2.4    | 2.6    | 1.6     | 0.86    | 1.1     |            |            | [11]          |
| Netherlands                                  | 2001-2002    | 69  |       |        | 0.8    | 0.2    | 0.2     | 1.6     |         |            | <MDL       | [12]          |
| Sweden <sup>8</sup>                          | 2000-2001    | 15  | 2.07  | 0.07   | 0.83   | 0.19   | 0.17    | 0.56    |         |            |            | [13]          |
| Faroe Islands                                | 1994-1995    | 57  |       |        | 1.3    | 0.33   | 0.51    | 1.0     | 0.77    |            |            | [14]          |
| <b>Asia</b>                                  |              |     |       |        |        |        |         |         |         |            |            |               |
| Korea                                        | 2008-2009    | 26  |       |        |        |        |         |         |         |            | <MDL       | [15]          |
| Korea <sup>9,10</sup>                        | 2007         | 20  | 5.5   | 0.74   | 3.0    | 2.5    | 1.9     | 4.0     | 16      |            |            | [16]          |
| China <sup>2,4</sup>                         | 2007         | 25  | 0.02  |        |        |        |         |         |         |            |            | [17]          |
| Japan <sup>11</sup>                          | 2005-2006    | 16  | 3.0   | 0.03   | 0.30   | 0.04   | 0.13    | 0.48    | 1.1     |            | 0.35       | [18]          |

MDL = method detection limit (may also be reported as less than limit of detection (LOD) or limit of quantification (LOQ))

<sup>1</sup>  $\Sigma$ PBDE equal to the sum of BDE-28, BDE-47, BDE-99, BDE-100, BDE-153

<sup>2</sup>  $\Sigma$ PBDE equal to the sum of BDE-28, BDE-47, BDE-99, BDE-100, BDE-153, BDE-154

<sup>3</sup> Measured in plasma

<sup>4</sup> Control group only

<sup>5</sup>  $\Sigma$ PBDE equal to the sum of BDE-47, BDE-99, BDE-100, BDE-153, BDE-154, BDE-183

<sup>6</sup>  $\Sigma$ PBDE equal to the sum of BDE-17, BDE-28, BDE-47, BDE-66, BDE-71, BDE-85, BDE-99, BDE-100, BDE-138, BDE-153, BDE-154, BDE-183, BDE-190, BDE-209

<sup>7</sup>  $\Sigma$ PBDE equal to the sum of BDE-17, BDE-28, BDE-47, BDE-66, BDE-85, BDE-99, BDE-100, BDE-153, BDE-154, BDE-183, BDE-184, BDE-191

<sup>8</sup>  $\Sigma$ PBDE equal to the sum of BDE-17, BDE-28, BDE-47, BDE-66, BDE-85, BDE-99, BDE-100, BDE-153, BDE-154, and BDE-183

<sup>9</sup>  $\Sigma$ PBDE equal to the sum of BDE-47, BDE-99

<sup>10</sup> Geometric means are presented

<sup>11</sup>  $\Sigma$ PBDE equal to the sum of BDE-15, BDE -28, BDE -47, BDE -49, BDE -66, BDE-85, BDE-99, BDE-100, BDE-153, BDE-154, BDE -197, BDE -207, BDE -209

Table S5. Spearman rank correlations between PBDE congeners and OH-PBDEs in the serum of second trimester pregnant women from Northern and Central California, 2008-2009 (N=25)

|             | BDE-028       | BDE-047       | BDE-085       | BDE-099      | BDE-100        | BDE-153      | BDE-207 | 4'-OH-BDE17   | 5-OH-BDE47    | 6-OH-BDE47 |
|-------------|---------------|---------------|---------------|--------------|----------------|--------------|---------|---------------|---------------|------------|
| BDE-028     | --            |               |               |              |                |              |         |               |               |            |
| BDE-047     | <b>0.80**</b> | --            |               |              |                |              |         |               |               |            |
| BDE-085     | <b>0.53**</b> | <b>0.84**</b> | --            |              |                |              |         |               |               |            |
| BDE-099     | 0.28          | <b>0.63**</b> | <b>0.76**</b> | --           |                |              |         |               |               |            |
| BDE-100     | <b>0.64**</b> | <b>0.83**</b> | <b>0.81**</b> | <b>0.45*</b> | --             |              |         |               |               |            |
| BDE-153     | 0.16          | 0.26          | 0.27          | -0.15        | <b>0.56***</b> | --           |         |               |               |            |
| BDE-207     | -0.07         | -0.05         | -0.02         | 0.17         | -0.02          | -0.09        | --      |               |               |            |
| 4'-OH-BDE17 | 0.13          | 0.10          | 0.05          | 0.19         | 0.02           | 0.01         | 0.08    | --            |               |            |
| 5-OH-BDE47  | 0.39          | 0.32          | 0.26          | -0.01        | 0.33           | <b>0.45*</b> | -0.02   | <b>0.46*</b>  | --            |            |
| 6-OH-BDE47  | 0.32          | 0.06          | -0.06         | -0.15        | 0.04           | 0.09         | -0.17   | 0.24          | <b>0.55**</b> | --         |
| 4'-OH-BDE49 | -0.02         | 0.14          | 0.13          | 0.14         | 0.03           | 0.27         | -0.25   | <b>0.53**</b> | <b>0.67**</b> | 0.30       |

\* $p < 0.05$ ; \*\* $p < 0.01$

## Literature Cited

1. La Guardia, M. J.; Hale, R. C.; Harvey, E., Detailed polybrominated diphenyl ether (PBDE) congener composition of the widely used penta-, octa-, and deca-PBDE technical flame-retardant mixtures. *Environmental Science & Technology* **2006**, *40* (20), 6247-6254.
2. Woodruff, T. J.; Zota, A. R.; Schwartz, J. M., Environmental chemicals in pregnant women in the US: NHANES 2003-2004. *Environ. Health Perspect.* **2011**, *119* (6), 878–885.
3. Qiu, X. H.; Bigsby, R. M.; Hites, R. A., Hydroxylated metabolites of polybrominated diphenyl ethers in human blood samples from the United States. *Environ Health Perspect* **2009**, *117* (1), 93-98.
4. Carmichael, S. L.; Herring, A. H.; Sjobin, A.; Jones, R.; Needham, L.; Ma, C.; Ding, K.; Shaw, G. M., Hypospadias and halogenated organic pollutant levels in maternal mid-pregnancy serum samples. *Chemosphere* **2010**, *80* (6), 641-646.
5. Wolff, M. S.; Teitelbaum, S. L.; Li, P. J.; Santella, R. M.; Wang, R. Y.; Jones, R. L.; Caldwell, K. L.; Sjödin, A.; Turner, W. E.; Li, W.; Georgopoulos, P.; Berkowitz, G. S., Exposures among pregnant women near the World Trade Center site on 11 September 2001. *Environ. Health Perspect.* **2005**, *113* (6), 739-748.
6. Mazdai, A.; Dodder, N. G.; Abernathy, M. P.; Hites, R. A.; Bigsby, R. M., Polybrominated diphenyl ethers in maternal and fetal blood samples. *Environ Health Perspect* **2003**, *111* (9), 1249-1252.
7. Chevrier, J.; Harley, K. G.; Bradman, A.; Gharbi, M.; Sjobin, A.; Eskenazi, B., Polybrominated diphenyl ether (PBDE) flame retardants and thyroid hormone during pregnancy. *Environ. Health Perspect.* **2010**, *118* (10), 1444-9.
8. Frederiksen, M.; Thomsen, C.; Froshaug, M.; Vorkamp, K.; Thomsen, M.; Becher, G.; Knudsen, L. E., Polybrominated diphenyl ethers in paired samples of maternal and umbilical cord blood plasma and associations with house dust in a Danish cohort. *International Journal of Hygiene and Environmental Health* **2010**, *213* (4), 233-242.
9. Antignac, J. P.; Cariou, R.; Zalko, D.; Berrebi, A.; Cravedi, J. P.; Maume, D.; Marchand, P.; Monteau, F.; Riu, A.; Andre, F.; Le Bizec, B., Exposure assessment of French women and their newborn to brominated flame retardants: determination of tri- to decapolybromodiphenylethers (PBDE) in maternal adipose tissue, serum, breast milk and cord serum. *Environmental Pollution* **2009**, *157* (1), 164-173.
10. Vizcaino, E.; Grimalt, J. O.; Lopez-Espinosa, M. J.; Llop, S.; Rebagliato, M.; Ballester, F., Polybromodiphenyl ethers in mothers and their newborns from a non-occupationally exposed population (Valencia, Spain). *Environment International* **2011**, *37* (1), 152-157.
11. Gomara, B.; Herrero, L.; Ramos, J. J.; Mateo, J. R.; Fernandez, M. A.; Garcia, J. F.; Gonzalez, M. J., Distribution of polybrominated diphenyl ethers in human umbilical cord



- serum, paternal serum, maternal serum, placentas, and breast milk from Madrid population, Spain. *Environmental Science & Technology* **2007**, *41* (20), 6961-6968.
12. Meijer, L.; Weiss, J.; Van Velzen, M.; Brouwer, A.; Bergman, A.; Sauerf, P. J. J., Serum concentrations of neutral and phenolic organohalogenes in pregnant women and some of their infants in the Netherlands. *Environmental Science & Technology* **2008**, *42* (9), 3428-3433.
  13. Guvenius, D. M.; Aronsson, A.; Ekman-Ordeberg, G.; Bergman, A.; Noren, K., Human prenatal and postnatal exposure to polybrominated diphenyl ethers, polychlorinated biphenyls, polychlorobiphenylols, and pentachlorophenol. *Environ Health Perspect* **2003**, *111* (9), 1235-1241.
  14. Fangstrom, B.; Hovander, L.; Bignert, A.; Athanassiadis, I.; Linderholm, L.; Grandjean, P.; Weihe, P.; Bergmamt, A., Concentrations of polybrominated diphenyl ethers, polychlorinated biphenyls, and polychlorobiphenylols in serum from pregnant Faroese women and their children 7 years later. *Environmental Science & Technology* **2005**, *39* (24), 9457-9463.
  15. Wan, Y.; Choi, K.; Kim, S.; Ji, K.; Chang, H.; Wiseman, S.; Jones, P. D.; Khim, J. S.; Park, S.; Park, J.; Lam, M. H. W.; Giesy, J. P., Hydroxylated polybrominated diphenyl ethers and bisphenol A in pregnant women and their matching fetuses: placental transfer and potential risks. *Environmental Science & Technology* **2010**, *44* (13 ), 5233-5239.
  16. Kang, C. S.; Lee, J. H.; Kim, S. K.; Lee, K. T.; Lee, J. S.; Park, P. S.; Yun, S. H.; Kannan, K.; Yoo, Y. W.; Ha, J. Y.; Lee, S. W., Polybrominated diphenyl ethers and synthetic musks in umbilical cord serum, maternal serum, and breast milk from Seoul, South Korea. *Chemosphere* **2010**, *80* (2), 116-122.
  17. Zhang, J. Q.; Jiang, Y. S.; Zhou, J.; Wu, B.; Liang, Y.; Peng, Z. Q.; Fang, D. K.; Liu, B.; Huang, H. Y.; He, C.; Wang, C. L.; Lu, F. N., Elevated body burdens of PBDEs, dioxins, and PCBs on thyroid hormonehomeostasis at an electronic waste recycling site in China. *Environmental Science & Technology* **2010**, *44* (10), 3956-3962.
  18. Kawashiro, Y.; Fukata, H.; Inoue, M. O.; Kubonoya, K.; Jotaki, T.; Takigami, H.; Sakai, S. I.; Mori, C., Perinatal exposure to brominated flame retardants and polychlorinated biphenyls in Japan. *Endocr. J.* **2008**, *55* (6), 1071-1084.
